# Supplementary material for: NAD Modulates DNA Methylation and Cell Differentiation
Source: MDPI journal article supplement (doi:10.3390/cells10112986), 2021-11-02
Supplement: s1 [file s1]

## Supplementary material

**Table S1.** qRT-PCR primer sets.

| Primers | CEBPA                           |
|---------|---------------------------------|
| Forward | 5'-TCGGTGGACAAGAACAG-3'         |
| Reverse | 5'-GCAGGCGGTCATTG-3'            |
| Probe   | 5'-ACAAGGCCAAGCAGCGC-3'         |
|         | PARP1                           |
| Forward | 5'-AAGATGATCTTTGATGTGGAAAGTA-3' |
| Reverse | 5'-TGCCCTTGGGGAAGCTGAGCAAA-3'   |
| Probe   | 5'-GAAGAAAGCCATGGTGGAGT-3'      |

DNMT1(ThermoFisher cat. No. hs00945875\_m1); GAPDH (ThermoFisher cat. No. 4310884E); 18S rRNA (ThermoFisher cat.No. 4310893E).

**Table S2.** Bisulfite sequencing primer sets.

| Region                | Forward Primer                | Reverse Primer                 |
|-----------------------|-------------------------------|--------------------------------|
| -0.8 (-557; -857)     | 5'-CAGCTCCGCTAGTCTGGGGGGCC-3' | 5'-CACAGGGGTAGCCTGGAGATCAGA-3' |
| -1.1 (-895; -1.122)   | 5'-CACTCAAGGGGCCCCAGG-3'      | 5'-CCAGAGTTAAGTTTGTCTCC-3'     |
| -1.4 (-1.120; -1.473) | 5'-GGTGTTTTTAGCTGTGCCCCCT-3'  | 5'-TCAAGGGGCCCCAGGGCCT-3'      |

**Table S3.** ChIP-qPCR primer sets.

| Region                | Forward Primer                | Reverse Primer                 |
|-----------------------|-------------------------------|--------------------------------|
| -0.8 (-557; -857)     | 5'-CAGCTCCGCTAGTCTGGGGGGCC-3' | 5'-CACAGGGGTAGCCTGGAGATCAGA-3' |
| -1.4 (-1.120; -1.473) | 5'-GGTGTTTTTAGCTGTGCCCCCT-3'  | 5'-TCAAGGGGCCCCAGGGCCT-3'      |
